# Supplementary material
Source: publisher figshare collection journal article supplement (https://sage.figshare.com/ndownloader/files/20028485)
Supplement: Supplementary file 1 [file 20028485]

## Sheet: RUGGEDNESS
WARTIGER NUMBER	CoW War Number	War Name	space	TRImean	TRImedian	TRIstdev	TRImin	TRImax	TRIOrdinalCAT
1	1	Franco-Spanish War	40229	134.422	86.1046	134.481	0	1106.61	3
2	4	First Russo-Turkish	74357	170.039	98.8989	182.793	0	1284.54	4
3	7	Mexican-American	258183	102.648	43.7035	135.95	0	1514.65	2
4	10	Austro-Sardinian	3208	58.2174	8.66025	134.925	0	1174.04	1
5	13	First Schleswig-Holstein	1300	18.1507	14.3178	14.2913	1.41421	129.846	1
6	16	Roman Republic	909	53.3189	38.2623	48.0563	1	338.121	1
7	19	La Plata	2554	28.5195	22.4722	20.3849	0	199.78	1
8	22	Crimean	62404	123.511	72.0417	144.108	0	1519.85	3
9	25	Anglo-Persian	9925	25.8183	3.16228	50.9647	0	586.372	1
10	28	Italian Unification	20156	162.268	114.331	174.265	0	1264.43	4
11	31	First Spanish-Moroccan	234	184.013	166.328	114.72	1.73205	653.143	4
12	34	Italian-Roman	8227	206.4	166.751	169.836	0	1192.44	4
13	37	Neapolitan	4791	251.754	226.544	203.018	0	1109.52	5
14	40	Franco-Mexican	241489	153.585	87.0057	170.529	0	1679.84	3
15	43	Ecuadorian-Colombian	3476	384.398	365.01	210.466	11.7047	1254.95	5
16	46	Second Schleswig-Holstein	1289	17.5181	14	12.7208	1	100.787	1
17	49	Lopez	19937	9.05609	6	9.41483	0	88.9607	1
18	52	Naval War	0.239495	16.7175	8.77496	9.44005	4.12311	23.4734	1
19	55	Seven Weeks	65077	70.0963	55.0636	58.1043	0	550.397	1
20	58	Franco-Prussian	66499	54.9025	37.9605	57.3367	0	588.514	1
21	60	First Central American	2353	187.018	159.233	135.043	0	913.118	4
22	61	Second Russo-Turkish	5837	176.177	144.478	146.257	0	1194.36	4
23	64	War of the Pacific	7910	357.952	309.507	277.22	0	1793.48	5
24	65	Conquest of Egypt	2219	15.4062	9.74679	17.3832	0	155.727	1
25	67	Sino-French	34664	262.012	228.022	210.083	0	1326.28	5
26	70	Second Central American	3281	197.361	165.741	156.138	1.41421	913.118	4
27	73	First Sino-Japanese	20002	93.8621	62.9444	100.365	0	898.62	2
28	76	Greco-Turkish	1322	117.427	59.8832	140.173	0	930.04	3
29	79	Spanish-American	1114	86.3926	47.5552	103.926	0	627.52	2
30	82	Boxer Rebellion	509	3.68426	3.16228	2.03696	0	20.6882	1
31	83	Sino-Russian	355587	82.6617	44.1135	97.4116	0	906.973	2
32	85	Russo-Japanese	9519	94.5771	70.1285	88.3721	0	618.577	2
33	88	Third Central American	2353	187.018	159.233	135.043	0	913.118	4
34	91	Fourth Central American	14486	227.84	209.48	153.815	0	1162.05	4
35	94	Second Spanish-Moroccan	727	146.734	92.0706	133.676	2.82843	699.576	3
36	97	Italian-Turkish	3619	30.1939	12.9228	49.4249	0	555.207	1
37	100	First Balkan	33935	209.624	162.705	179.18	0	1245.78	4
38	103	Second Balkan	28744	136.882	84.306	139.774	0	1043.32	3
39	106	World War I	576094	40.0785	20.199	72.8579	0	1582.92	1
40		WWI Western	90877	89.3861	37.8946	143.958	0	1480.85	2
41		WWI Eastern	479873	30.948	18.3848	43.3457	0	794.541	1
42		WWI Belgian	26716	70.9728	60.2951	55.1542	0	459.64	1
43	107	Estonian Liberation	11429	15.5085	12.6491	10.6478	0	141.908	1
44	108	Latvian Liberation	19974	15.5325	12.9615	10.4089	0	101.223	1
45	109	Russo-Polish	86189	16.0489	13.6748	10.6659	0	123.887	1
46	112	Hungarian Adversaries	20637	100.352	54.6352	122.562	0	732.061	2
47	115	Second Greco-Turkish	18597	159.125	127.636	129.499	0	1112.05	3
48	116	Franco-Turkish	15933	236.031	184.076	199.546	0	1321.64	4
49	117	Lithuanian-Polish	61964	16.4288	13.9642	10.9626	0	173.937	1
50	118	Manchurian	111470	60.8621	37.3229	70.0919	0	695.192	1
51	121	Second Sino-Japanese	83974	55.5056	24.5561	73.8165	0	660.345	1
52	124	Chaco	32922	3.78919	3.31662	2.15288	0	56.9912	1
53	125	Saudi-Yemeni	47145	80.4518	35.4401	114.927	1.73205	1101.63	2
54	127	Conquest of Ethiopia	54350	131.534	57.6628	159.898	0	1245.85	3
55	130	Third Sino-Japanese	183220	74.9473	14.1421	122.69	0	1153.95	1
56	133	Changkufeng	9105	167.538	155.48	97.0868	0	605.742	4
57	136	Nomonhan	77677	57.7676	33.0151	64.1086	0	602.104	1
58	139P	World War II Pacific	679352	113.469	63.914	136.877	0	1482.99	2
59	139E	World War II Europe	1511498	60.4552	21.7715	109.547	0	1700.55	1
60		German_Polish	127589	39.5723	18.7883	65.7765	0	860.313	1
61		German_Belgian	29642	61.8573	47.6445	56.106	0	459.64	1
62		German_Danish	11223	20.2544	15.9374	16.0014	0	160.922	1
63		German_Dutch	27721	9.03473	4.69042	13.2699	0	177.265	1
64		German_French	155691	58.6457	39.6989	65.4094	0	1323.66	1
65		German_Greek	36963	232.681	198.957	178.281	0	1231.59	4
66		German_Norwegian	51036	160.805	125.409	134.088	0	1600.05	3
67		German_Soviet	1148208	39.2721	18.5472	64.4781	0	1128.84	1
68		German_Yugoslav	53171	175.519	135.318	160.23	0	1275.49	4
69		Italian_Greek	6867	328.342	295.887	203.352	0	1482.17	5
70		Western	456538	94.3386	41.4488	144.202	0	1700.55	2
71		American_Japanese	21899	264.917	227.414	217.659	0	1464.2	5
72	142	Russo-Finnish	227701	41.1356	29.2746	38.7808	0	544.172	1
73	145	Franco-Thai	22462	55.0698	15.6525	98.1377	0	879.374	1
74	147	First Kashmir War	11920	290.631	189.857	289.546	0	1452.39	5
75	148	Arab-Israeli	3854	96.082	64.4127	91.9068	0	643.096	2
76	151	Korean	30961	224.037	209.69	142.28	0	898.62	4
77	153	Off-shore Islands	30	45.231	34.2457	32.2277	12	147.76	1
78	155	Sinai War	5526	44.191	24.7588	52.9732	0	615.618	1
79	156	Soviet Invasion of Hungary	11246	22.8724	7.87401	36.7105	0	448.738	1
80	158	IfniWar	64479	21.9573	10.4403	41.5953	0	571.325	1
81	159	Taiwan Straits	30	45.231	34.2457	32.2277	12	147.76	1
82	160	Assam	119571	503.281	477.995	310.182	0	3848.83	6
83	163	Vietnam War, Phase 2	23555	145.247	66.5658	170.594	0	1026.35	3
84		North Vietnam-Vietnam	23555	145.247	66.5658	170.594	0	1026.35	3
85	166	Second Kashmir	74674	44.6379	5.56776	134.596	0	1389.99	1
86	169	Six-Day War	6122	59.0101	28.8531	70.6744	1.73205	668.4	1
87	170	Second Laotian, Phase 2	13553	235.503	206.213	175.114	1	1004.22	4
88	172	War of Attrition	2615	27.6117	17.6918	44.703	0	565.341	1
89	175	Football War	3365	260.983	246.712	140.113	2.44949	883.812	5
90	176	Communist Coalition	10150	57.3732	18.4932	95.0863	0	712.19	1
91	178	Bangladesh	21941	31.6837	4.47214	92.6611	0	1036.57	1
92	181	Yom Kippur War	2389	60.7314	26.1725	97.0469	0	726.102	1
93	184	Turco-Cypriot	1317	123.818	63.773	136.595	2	792.415	3
94	186	War over Angola	49771	77.8562	47	101.159	0	1088.29	1
95	187	Second Ogaden War, Phase 2	5161	60.3599	23.7697	86.329	4.69042	595.824	1
96	189	Vietnamese-Cambodian	19729	28.4693	10.4881	61.2723	0	761.697	1
97	190	Ugandian-Tanzanian	3712	84.4845	51.5558	104.895	1.73205	1039.26	2
98	193	Sino-Vietnamese Punitive	5402	320.589	265.368	222.994	0	1239.72	5
99	199	Iran-Iraq	42606	151.284	65.1114	190.817	0	1390.6	3
100	202	Falkland Islands	653	91.5354	74.0945	70.6891	7	384.792	2
101	205	War over Lebanon	359	205.735	181.047	141.398	1.73205	752.637	4
102	207	War over the Aouzou Strip	30567	51.4396	20.8327	78.0803	1	932.308	1
103	208	Sino-Vietnamese Border War	3787	383.282	357.108	194.013	37.4967	1261.94	5
104	211	Gulf War	27297	8.61607	6.78233	7.15468	0	106.813	1
105	215	Bosnian Independence	9863	253.784	221.457	168.646	0	1275.49	5
106	216	Azeri-Armenian	4267	253.775	237.283	181.129	5.74456	1073.9	5
107	217	Cenepa Valley	936	258.874	255.832	217.914	2	907.934	5
108	219	Badme Border	5504	190.112	124.555	183.771	3	1076.04	4
109	221	War for Kosovo	2549	209.476	183.082	155.758	2.23607	1134.87	4
110	223	Kargil War	829	669.765	667.682	218.592	200.26	1403.63	6
111	225	Invasion of Afghanistan	6112	222.487	132.759	231.532	2	1361.85	4
112	227	Invasion of Iraq	9459	5.2856	3.4641	5.44883	0	82.4864	1

## Sheet: LAND COVER
WARTIGER NUMBER	CoW War Number	War Name	tun	wat	urb	des	trpebf	trpdbf	tmpebf	tmpenf	tmpdbf	borenf	bordnf	sava	c3grass	c4grass	dshrub	oshrub	pdri	strpebf	strpdbf	stmpebf	stmpenf	stmpdbf	sborenf	sbordnf	c3crop	c4crop	c3past	c4past	traff	ntraff
1	1	Franco-Spanish War	0	3.87679	0.0328571	0	0	0.778214	1.74143	1.30357	1.33179	0	0	0	17.2659	0.887143	22.9786	2.11036	0	0	0.00107143	0.151786	0.991786	0.20625	0	0	20.0866	1.92161	22.3136	2.02071	66.6059	33.3941
2	4	First Russo-Turkish	0.923437	3.57292	0.00625	0	0	0	0.132708	1.98104	14.516	0.442812	1.21542	0	36.9204	6.65937	0	0.191354	0	0	0	0.031875	0.189062	1.58604	0.151042	0.352604	19.1318	4.09396	5.81219	2.08969	75.8222	24.1778
3	7	Mexican-American	0.00767241	0.597299	0	0.477586	0.137385	0.111236	0	6.52385	1.26739	0.88954	0.606178	2.4258	21.6229	13.3603	8.70511	35.1395	0.0128736	0.0459483	0.0808333	0	0.222615	0.0168391	0.00310345	0	0.822069	1.20181	3.97598	1.74615	80.7798	19.2202
4	10	Austro-Sardinian	0	0.985556	0.184444	0	0	0	0	1.27111	18.1589	2.39889	0	0	2.32444	0.111111	0	0	0	0	0	0	0	1.63778	0.0444444	0	39.8556	27.2289	5.79778	0.00111111	75.3189	24.6811
5	13	First Schleswig-Holstein	0	18.7225	0.075	0	0	0	0	1.68	32.75	0	0	0	5.06	0	0	0	0	0	0	0	0.24	4.2425	0	0	18.2675	0.5725	18.39	0	42.29	57.71
6	16	Roman Republic	0	9.07	0.025	0	0	0	0	0	0	0	0	0	0.4275	0.105	35.345	0	0	0	0	0	0	0	0	0	39.74	10.21	3.7575	1.32	55.56	44.44
7	19	La Plata	0	6.54405	0.00567568	0	0	0	0	0	0	0	0	0.649459	49.0865	38.7114	0	0	0	0	0	0	0	0	0	0	0.730811	0.224595	2.26108	1.78649	93.4503	6.54973
8	22	Crimean	0.159136	3.64049	0.0196296	0	0	0	0	3.35642	30.9702	0.261728	0.587778	0	17.3284	4.18407	0	0.24642	0	0	0	0	0.0971605	2.45877	0.10321	0.265556	18.8716	7.44654	7.37173	2.63111	58.239	41.761
9	25	Anglo-Persian	0	9.63	0.0025	18.8656	0	0	0	0	0	0	0	0	1.25312	0.109375	0	51.5737	0	0	0	0	0	0	0	0	6.83875	0.354375	10.9619	0.410625	90.3675	9.6325
10	28	Italian Unification	0	1.45222	0.122963	0	0	0	0.156296	0.546296	14.9019	0	0	0	2.11407	0.623333	27.8467	0	0	0	0	0	0.0037037	0.961111	0	0	26.7019	9.57185	11.4137	3.58407	54.0089	45.9911
11	31	First Spanish-Moroccan	0	15.1633	0.0233333	0	0.643333	0	0	0	0	0	0	0	0	0	70.1667	0	0	0.216667	0	0	0	0	0	0	9.77667	0.676667	2.53667	0.796667	13.7867	86.2133
12	34	Italian-Roman	0	12.1138	0.08	0	0	0	0	0.352308	16.5292	0	0	0	1.73077	0.764615	24.6554	0	0	0	0	0	0.00769231	0.936154	0	0	20.3638	3.54615	13.3569	5.56308	45.3254	54.6746
13	37	Neapolitan	0	15.8914	0.0257143	0	0	0	0	0	5.05	0	0	0	0.777143	0	46.5114	0	0	0	0	0	0	3.84857	0	0	11.3771	2.51	12.3129	1.69571	28.6729	71.3271
14	40	Franco-Mexican	0.00629526	1.15524	0.000835655	0	5.64357	9.46109	0	3.89891	0.0368524	0	0	6.38145	14.4029	9.52315	17.4008	19.3934	0	0.717159	0.526295	0	0.541476	0	0	0	1.17825	2.14955	4.94482	2.63797	60.6178	39.3822
15	43	Ecuadorian-Colombian	5.94143	0.234286	0.00428571	0	51.75	6.07571	0	0	0	0	0	5.52286	6.75429	1.75286	0	7.42429	0	0.66	0.0142857	0	0	0	0	0	0.348571	0.0128571	4.15	9.35429	41.2614	58.7386
16	46	Second Schleswig-Holstein	0	9.624	0.128	0	0	0	0	1.26	21.088	0	0	0	7.292	0	0	0	0	0	0	0	2.718	4.59	0	0	18.658	0.936	33.706	0	60.592	39.408
17	49	Lopez	0	3.26212	0	0.138485	6.51818	0.20303	0	0	0	0	0	26.8882	16.5348	34.3997	3.47545	0	0	0.146061	0	0	0	0	0	0	0.492727	0	2.71424	5.22697	86.3952	13.6048
18	52	Naval War	-999	-999	-999	-999	-999	-999	-999	-999	-999	-999	-999	-999	-999	-999	-999	-999	-999	-999	-999	-999	-999	-999	-999	-999	-999	-999	-999	-999	-999	-999
19	55	Seven Weeks	0	0.55	0.0964179	0	0	0	0	2.65776	33.1054	0	0	0	7.77358	0.401493	0	0	0	0	0	0	1.09522	4.6509	0	0	26.0036	3.1094	19.9212	0.635075	57.8443	42.1557
20	58	Franco-Prussian	0	0.411591	0.106364	0	0	0	0	0.190227	14.9376	0	0	0	4.93091	0.381136	0	0	0	0	0	0	0.0153409	5.1575	0	0	42.4873	6.86841	22.705	1.80864	79.1814	20.8186
21	60	First Central American	0	3.42333	0.075	0	49.73	3.15833	0	0	0	0	0	22.2817	8.88	0.0116667	0	0	0	3.28333	0.0166667	0	0	0	0	0	2.15167	2.55333	0.575	3.86	40.3133	59.6867
22	61	Second Russo-Turkish	0.575625	4.78563	0.026875	0	0	0	0	0.364375	6.33687	0.47625	0.876875	0	55.5862	2.55562	0	0.59375	0	0	0	0	0.23375	4.57625	0.593125	1.01688	14.6644	0.963125	5.35375	0.420625	80.7131	19.2869
23	64	War of the Pacific	14.6918	4.87612	0.00571429	32.7065	4.42816	2.10612	0	0.0291837	0	0.03	0	1.23265	24.9006	1.27796	0.0544898	6.04592	0	0.0273469	0.00244898	0	0	0	0	0	1.37	0.353878	5.63388	0.227143	88.4404	11.5596
24	65	Conquest of Egypt	0	2.158	0.116	70.06	0	0	0	0	0	0	0	0	9.21	0.214	1.028	2	0	0	0	0	0	0	0	0	11.622	3.592	0	0	96.698	3.302
25	67	Sino-French	0	4.15236	0.0225455	0	26.2805	11.2498	3.14055	6.16927	0.818727	0	0	29.8591	0.551818	1.31109	2.64236	0	0	2.25164	2.14145	0.427273	0.161636	0.0270909	0	0	6.54982	0.447818	0.703636	1.09145	40.5147	59.4853
26	70	Second Central American	0	3.78222	0.0444444	0	34.4	2.77111	0	0	0	0	0	43.01	0	0.00111111	0.45	0.225556	0	2.11667	0.0622222	0	0	0	0	0	3.08889	3.46556	1.43222	5.15	56.3733	43.6267
27	73	First Sino-Japanese	0.273333	7.72667	0.0328571	0.373333	0	0	0	5.23881	43.769	0	0	0	9.72929	3.33214	0.128333	0	0	0	0	0	1.18738	2.41071	0	0	16.0436	6.75833	1.8069	1.18929	39.5062	60.4938
28	76	Greco-Turkish	0	7.69667	0.00833333	0	0	0	16.8733	1.1	4.79667	0	0	0	1.85333	0.283333	12.34	0	0	0	0	0	0	1.59667	0	0	16.3517	1.42667	31.175	4.49833	55.5883	44.4117
29	79	Spanish-American	0	9.30312	0.00625	0	40.0944	15.83	0	0	0	0	0	3.35625	22.8544	2.2525	0	0	0	1.05187	0.16125	0	0	0	0	0	2.595	0.694375	0.235625	1.565	33.5531	66.4469
30	82	Boxer Rebellion	0.704	8.6	0.004	1.046	0	0	0	0	31.48	0	0	0	0.304	0.354	0	0	0	0	0	0	0	2.182	0	0	36.476	15.06	1.868	1.922	57.734	42.266
31	83	Sino-Russian	0.766995	1.73916	0.0102217	0.00359606	0	0	0	5.37618	21.9197	0.115419	3.81392	0.0282759	28.4142	11.7327	2.11953	4.06581	0	0	0	0	0.349015	2.15576	0.0234236	0.55101	4.12473	3.60963	6.46744	2.61335	61.8267	38.1733
32	85	Russo-Japanese	0.3396	4.8404	0.148	0	0	0	0	11.6952	40.1316	0	0	0	10.3416	3.5772	0	0	0	0	0	0	2.6548	1.5176	0	0	15.07	6.9032	1.7864	0.9944	39.0124	60.9876
33	88	Third Central American	0	3.42333	0.11	0	45.0533	2.88167	0	0	0	0	0	20.7683	10.3733	0.00166667	0	0	0	3.925	0.0216667	0	0	0	0	0	3.24167	3.85833	0.936667	5.405	44.585	55.415
34	91	Fourth Central American	0	5.19968	0.00870968	0	61.2548	3.9871	0	0	0	0	0	16.6226	2.32645	0.502903	0.41871	0.0616129	0	1.06258	0.00451613	0	0	0	0	0	1.58097	1.7271	1.02903	4.21323	28.0639	71.9361
35	94	Second Spanish-Moroccan	0	0	0	0	0	0	0	0	0	0	0	0	67.36	0	17.23	5.835	0	0	0	0	0	0	0	0	3.165	0.08	6.33	0	82.77	17.23
36	97	Italian-Turkish	0	19.735	0.0258333	25.1117	0	0	0	0	0	0	0	0	8.09583	0.4575	8.01083	7.33667	0	0	0	0	0	0	0	0	12.5008	1.44333	16.225	1.0575	72.2283	27.7717
37	100	First Balkan	0	2.83545	0.054697	0	0.0293939	0	1.85879	2.69758	22.8273	0	0	0	10.8695	2.9803	5.38333	3.04106	0	0	0	0.252879	0.775606	5.28076	0	0	21.2447	2.40091	14.7145	2.75318	58.0042	41.9958
38	103	Second Balkan	0	2.31294	0.0537255	0	0.0378431	0	0.702353	1.36588	28.778	0	0	0	12.1253	3.9349	0.177451	2.52333	0	0	0	0.0647059	0.000392157	0.762941	0	0	28.9712	4.68647	10.6114	2.89118	65.7437	34.2563
39	106	World War I	0.171517	2.63545	0.20031	0.905259	0	0	0.113138	18.2634	7.1825	0.0647931	0.172845	0	10.9107	3.68128	0.362103	1.31205	0	0	0	0.0225172	0.552672	0.825655	0.0187586	0.0256724	35.9567	7.07486	7.99455	1.55328	69.5602	30.4398
40		WWI Eastern	0.19703	2.6701	0.13703	0.00137374	0	0	0	21.3738	6.61691	0.0468283	0.202525	0	10.9954	4.21549	0	0.10596	0	0	0	0	0.636081	0.353434	0.00391919	0.0300808	36.8505	7.18628	6.72333	1.65394	67.9293	32.0707
41		WWI Western	0.0229412	2.43365	0.568824	6.16906	0	0	0.772	0.150118	10.4762	0.169412	0	0	10.4169	0.570235	2.47082	8.33576	0	0	0	0.153647	0.0669412	3.57565	0.105176	0	30.752	6.426	15.3975	0.967059	79.0575	20.9425
42		WWI Belgian	0	0.566842	1.44263	0	0	0	0	0.353684	13.7547	0	0	0	9.89895	0	0	0	0	0	0	0	0.0452632	12.4737	0	0	35.2174	6.78316	19.4637	0	71.3632	28.6368
43	107	Estonian Liberation	0	2.76811	0.337297	0	0	0	0	59.2478	0	0.258919	0	0	5.21216	0	0	0	0	0	0	0	3.86865	0	0.00783784	0	21.1686	2.09541	5.03514	0	33.5114	66.4886
44	108	Latvian Liberation	0	4.2681	0.17	0	0	0	0	49.3179	0.508571	0	0	0	9.36643	0	0	0	0	0	0	0	1.22905	0	0	0	27.5426	1.83333	5.76405	0	44.5064	55.4936
45	109	Russo-Polish	1.36966	0.916136	0.219432	0	0	0	0	29.2973	10.0108	0	0	0	15.2951	0.0232955	0	0	0	0	0	0	0.553977	1.20886	0	0	30.1417	1.31239	9.61727	0.0340909	57.7935	42.2065
46	112	Hungarian Adversaries	0	0.22375	0.14625	0	0	0	0	1.00062	35.6728	0.155625	1.83937	0	11.4059	2.85625	0	0	0	0	0	0	0.0334375	2.85	0.0071875	0.249687	23.2103	8.85156	9.35437	2.14281	57.8212	42.1787
47	115	Second Greco-Turkish	0	3.97857	0.0588095	0	0	0	10.2412	1.07762	7.80619	0	0	0	20.051	0.994048	28.8388	5.0331	0	0	0	0.122857	0.00404762	0.0638095	0	0	16.8702	0.375238	4.30762	0.176905	47.8081	52.1919
48	116	Franco-Turkish	0	1.4864	0.0388	0	0	0	7.5552	0.034	1.7664	0	0	0	47.9832	0.4484	8.2268	6.1188	0	0	0	0.3616	0.0048	0.0452	0	0	16.44	1.328	8.088	0.0744	80.4808	19.5192
49	117	Lithuanian-Polish	1.41747	1.57313	0.123133	0	0	0	0	43.9933	4.69651	0	0	0	12.9453	0	0	0	0	0	0	0	0.996024	0.0473494	0	0	26.1296	0.948554	7.12964	0	48.5706	51.4294
50	118	Manchurian	0.576535	3.57646	0.0185039	0	0	0	0	3.03307	25.2661	0.0174803	0.388031	0	30.8803	9.20094	0.0161417	5.37882	0	0	0	0	0.198189	2.44811	0.00133858	0.612205	4.01709	2.68819	8.95465	2.7278	64.4243	35.5757
51	121	Second Sino-Japanese	0.0957843	1.54225	0.0456863	0.0095098	0	0	0	0.230686	23.6372	0	0.262647	0	23.3665	13.559	1.69118	2.61657	0	0	0	0	0.00784314	3.2002	0	0.0723529	10.6457	11.3324	4.63618	3.04843	69.31	30.69
52	124	Chaco	0	0.0207843	0	0	0.676667	26.6925	0	0	0	0	0	12.9853	3.27333	19.1516	10.5176	0	0	0	4.10412	0	0	0	0	0	0.0756863	0.0735294	5.78353	16.6453	57.9882	42.0118
53	125	Saudi-Yemeni	0	0.00304348	0.00362319	59.5899	0	0	0	0	0	0	0	0	0.00057971	0	0	16.6636	0	0	0	0	0	0	0	0	0.166087	0.102754	19.9158	3.55464	99.9933	0.00666667
54	127	Conquest of Ethiopia	0	0.280349	0.00430233	2.715	1.23442	0.0277907	0.578605	0	0	0	0	24.4642	0.553721	0.364884	23.7707	14.3536	0	0.000116279	0	0	0	0	0	0	5.69326	0.782209	16.0785	9.09837	74.1037	25.8963
55	130	Third Sino-Japanese	0	5.21579	0.0670111	0.0427306	3.3748	0.00682657	3.47808	4.62244	17.5145	0	0	0	4.1538	2.62616	0.0570111	0.0641697	0	0.103801	0	0.515055	0.539225	1.0759	0	0	46.8628	4.77712	2.48332	2.41948	63.4296	36.5704
56	133	Changkufeng	0	9.18077	0.123846	0	0	0	0	3.14385	46.9246	0	15.5492	0	5.61308	0.705385	0	0	0	0	0	0	0.496154	5.55077	0	2.61077	4.52692	0.756923	3.88154	0.936154	16.42	83.58
57	136	Nomonhan	0	1.38703	0	0	0	0	0	0.128901	0.522637	0	0.106593	0	37.3257	9.1478	0	7.88736	0	0	0	0	0.0838462	0.263846	0	1.30626	0.162857	0.0196703	31.7052	9.95231	96.2009	3.79912
58	139P	World War II Pacific	0.0809558	1.3644	0.0206452	0.00746714	17.8632	6.50994	0.00761051	0.983978	10.0769	0.00421744	0.551326	2.51907	23.4294	8.24958	1.8345	3.57382	0	0.703847	0.20822	0.00132616	0.162891	1.75217	0.163978	0.751159	5.90992	2.37523	7.99533	2.89884	57.0397	42.9603
59	139E	World War II Europe	0.326627	2.21592	0.408792	3.43054	0.0154005	0	0.351446	9.46429	7.34612	0.106502	0.0438798	0	9.86697	1.54429	2.60352	0.428267	0.00494368	0.0191051	0	0.0629412	1.165	4.42394	0.15709	0.0453567	35.0728	5.52502	14.1396	1.23156	71.5658	28.4342
60		German-Polish	0.236549	1.14824	0.752324	0	0	0	0	3.83359	11.3858	0	0	0	10.6494	0.220915	0	0	0	0	0	0	1.30662	10.4371	0.0347887	0.255423	45.1373	1.98585	12.318	0.298099	70.8461	29.1539
61		German-Belgian	0	0.839118	3.14294	0	0	0	0	0.386176	15.0279	0	0	0	16.3791	0	0	0	0	0	0	0	0.0632353	12.7297	0	0	28.9876	6.16882	16.2753	0	67.8109	32.1891
62		German-Danish	0	2.98444	0.440556	0	0	0	0	5.86389	14.6444	0	0	0	36.7789	0	0	0	0	0	0	0	0.005	0.527222	0	0	27.195	0.81	10.7506	0	75.5344	24.4656
63		German-Dutch	0	3.46676	2.13088	0	0	0	0	5.32912	15.1638	0	0	0	19.5538	0	0	0	0	0	0	0	0.0829412	3.26794	0	0	22.1647	7.08735	21.7526	0	70.5585	29.4415
64		German-French	0	0.764497	0.600635	0	0	0	0	0.243651	8.02926	0	0	0	10.9107	0.679259	0.0714815	0	0	0	0	0	1.54116	11.072	0	0	34.3926	6.9373	23.1189	1.63847	77.6774	22.3226
65		German-Greek	0	5.51807	0.0478947	0	0.0303509	0	1.75632	0.883333	12.1474	0	0	0	6.17789	1.00509	15.0835	4.39754	0	0	0	0.194211	0.720175	2.19649	0	0	18.8568	2.04579	25.5953	3.34386	61.4223	38.5777
66		German-Norwegian	5.61636	8.09255	0.372909	0	0	0	0	6.78327	0	41.1495	0	0	12.7902	0	0	0	0.446545	0	0	0	2.69327	0	15.3904	0	6.236	0	0.429091	0	25.0716	74.9284
67		German-Soviet	0.386529	1.80569	0.35616	0.000627148	0	0	0.0015378	12.9238	9.04161	0.178127	0.152345	0	9.77557	1.6002	0	0.00597938	0	0	0	0	1.65254	3.76803	0.0719674	0.0835052	41.0049	5.82616	10.4475	0.917259	69.9647	30.0353
68		German-Yugoslav	0	1.6737	0.21137	0	0	0	0	1.1726	24.6633	0	0	0	3.57521	1.19781	0	0	0	0	0	0	0.217397	18.3874	0	0	18.7581	9.23534	16.5536	4.35425	53.6742	46.3258
69		Italian-Greek	0	5.327	0.057	0	0	0	0	0.169	1.241	0	0	0	18.707	2.824	36.089	0	0	0	0	0	0	0.988	0	0	9.583	1.396	20.654	2.965	56.129	43.871
70		Western	0.238987	2.72535	0.60848	10.168	0.0414634	0	0.827054	0.309024	6.27493	0.118818	0.00851782	0	10.5308	0.626492	6.34839	0.950225	0.0239587	0.0582552	0	0.176904	0.177223	6.1833	0.375891	0.0563415	26.8802	4.91341	20.0423	1.33574	75.6861	24.3139
71		American-Japanese	0	7.36061	0.0453061	0	67.9249	0	0	0	0	0	0	1.1549	11.361	4.09898	0	0	0	3.42918	0	0	0	0	0	0	3.35653	0.6	0.0863265	0.582245	21.24	78.76
72	142	Russo-Finnish	0.118383	8.72892	0.0530539	0	0	0	0	1.16042	0	38.9865	1.31814	0	8.11156	0	0	0.834192	0	0	0	0	3.2491	0	29.9543	1.4924	5.56341	0.124491	0.30515	0	23.7861	76.2139
73	145	Franco-Thai	0	1.60321	0.0486792	0	24.7989	42.0913	0	0	0	0	0	5.18245	4.37189	8.79566	0.93283	0	0	0.269811	0.806038	0	0	0	0	0	8.14792	0.620189	0.668113	1.66302	29.4492	70.5508
74	147	First Kashmir War	2.39438	0.6875	0	0.503125	0	4.85937	0	9.57312	0	0	0	4.065	6.77875	0.813125	14.6119	16.195	0	0	0	0	0	0	0	0	25.8644	5.61937	6.86937	1.16562	70.2681	29.7319
75	148	Arab-Israeli	0	8.09083	0.309167	10.8583	0	0	0	0	0	0	0	0	27.7558	0	7.225	29.485	0	0	0	0	0	0	0	0	12.2558	1.5775	2.4425	0	84.375	15.625
76	151	Korean	0	5.47608	0.125098	0	0	0	0	9.96216	20.7261	0.528039	5.16	0.0537255	6.4898	2.00922	15.5251	0	0	0	0	0	11.0298	9.28549	0.143922	1.36961	10.0498	1.80765	0.219804	0.0386274	20.6686	79.3314
77	153	Off-shore Islands	-999	-999	-999	-999	-999	-999	-999	-999	-999	-999	-999	-999	-999	-999	-999	-999	-999	-999	-999	-999	-999	-999	-999	-999	-999	-999	-999	-999	-999	-999
78	155	Sinai War	0	3.70263	0.0647368	79.2379	0	0	0	0	0	0	0	0	2.51158	0.098421	0.243158	11.8616	0	0	0	0	0	0	0	0	1.47421	0.332632	0.465263	0.00789474	95.9895	4.01053
79	156	Soviet Invasion of Hungary	0	0.993333	0.957619	0	0	0	0	0.180952	9.45452	0	0	0	5.61429	1.74405	0	0	0	0	0	0	0.00952381	2.35881	0	0	49.2655	15.4467	11.4152	2.55952	86.0452	13.9548
80	158	IfniWar	0	0.533061	0.025102	82.6087	0	0	0	0	0	0	0	0	0	0	0	0.135306	0	0	0	0	0	0	0	0	0.174184	0	16.5199	0.00377551	99.4418	0.558163
81	159	Taiwan Straits	-999	-999	-999	-999	-999	-999	-999	-999	-999	-999	-999	-999	-999	-999	-999	-999	-999	-999	-999	-999	-999	-999	-999	-999	-999	-999	-999	-999	-999	-999
82	160	Assam	34.2109	0.88485	0.00185629	1.71575	0.521377	5.2409	0.0441317	0.208024	0	0.0596407	0	0.333832	5.03545	0.227006	0.0286228	3.07766	8.58946	0.662156	3.18395	0.0352695	0.270659	0	0.191617	0	0.957365	0.187186	34.2906	0.0417365	80.0775	19.9225
83	163	Vietnam War, Phase 2	0	2.22592	0.129184	0	52.0292	12.1463	0	0	0	0	0	5.4751	3.06367	4.9098	0.671633	0	0	1.4	0.21449	0	0	0	0	0	14.889	0.892449	0.358163	1.5951	31.1833	68.8167
84		North Vietnam-Vietnam	0	2.22592	0.129184	0	52.0292	12.1463	0	0	0	0	0	5.4751	3.06367	4.9098	0.671633	0	0	1.4	0.21449	0	0	0	0	0	14.889	0.892449	0.358163	1.5951	31.1833	68.8167
85	166	Second Kashmir	0.0127523	0.203578	0.109908	17.4671	0	0.155413	0	1.06899	0	0	0	0	0.486697	0.124954	6.9256	23.4697	0	0	0	0	0.156422	0	0	0	38.3525	5.41835	5.18853	0.859541	91.3801	8.61991
86	169	Six-Day War	0	10.1645	0.2655	65.419	0	0	0	0	0	0	0	0	4.363	0	4.1265	6.7535	0	0	0	0	0	0	0	0	6.7845	0.923	1.2005	0	85.4435	14.5565
87	170	Second Laotian, Phase 2	0	2.15667	0.0244444	0.0622222	73.4485	6.84741	0	0	0	0	0	2.36815	1.02815	4.26111	0.572963	0.310741	0	2.6363	0.0133333	0	0	0	0	0	3.55074	0.311111	0.516667	1.89148	14.3004	85.6996
88	172	War of Attrition	0	8.15	0.186	82.11	0	0	0	0	0	0	0	0	2.732	0	0.882	0.882	0	0	0	0	0	0	0	0	4.116	0.942	0	0	90.782	9.218
89	175	Football War	0	0.133333	0.233333	0	27.3233	0.433333	0	0	0	0	0	20.1833	0.00666667	0.00666667	0	0	0	9.64333	0	0	0	0	0	0	8.63333	9.89	8.91	14.6033	62.2333	37.7667
90	176	Communist Coalition	0	2.97091	0.196818	0	42.7536	17.7909	0	0	0	0	0	2.37909	1.18273	5.57227	0	0	0	1.24091	0.285	0	0	0	0	0	22.6045	0.465	0.502273	2.05591	34.7618	65.2382
91	178	Bangladesh	0	4.63673	0.351224	0	9.13347	2.0751	0	0.00530612	0	0	0	1.20245	2.34	4.04	0.0783673	0.0773469	0	6.26143	1.8851	0	0.0187755	0	0	0	63.1824	1.52939	1.10571	2.07714	75.5545	24.4455
92	181	Yom Kippur War	0	2.60429	0.52	48.9586	0	0	0	0	0	0	0	0	10.8586	0	0.638571	7.23714	0	0	0	0	0	0	0	0	24.4171	1.48714	3.27857	0	96.2371	3.76286
93	184	Turco-Cypriot	0	0	0	0	0	0	10.1933	0.29	0	0	0	0	56.58	0	26.0033	2.66667	0	0	0	0	0	0	0	0	2.09667	2.08667	0.0833333	0	63.5133	36.4867
94	186	War over Angola	0	2.5199	0.0235577	1.03596	2.25942	7.52856	0	0	0	0	0	29.5285	2.64971	2.70837	0	2.99788	0	0.638173	0.132596	0	0	0	0	0	2.01769	2.37971	22.6037	20.9763	86.8978	13.1022
95	187	Second Ogaden War, Phase 2	0	0.00727273	0.0463636	0.389091	0	0.621818	0	0	0	0	0	11.7809	0.25	0.280909	32.7873	7.69818	0	0	0	0	0	0	0	0	5.72	2.66455	20.2382	17.5155	66.5373	33.4627
96	189	Vietnamese-Cambodian	0	6.05389	0.206944	0	30.3908	20.9842	0	0	0	0	0	4.01722	2.54	8.21333	1.25028	0	0	1.16972	2.46833	0	0	0	0	0	19.0861	0.526111	0.777222	2.31583	37.4758	62.5242
97	190	Ugandian-Tanzanian	0	10.9579	0.11	1.42786	9.25071	0.225	0	0	0	0	0	10.6786	0.025	1.28714	0	0	0	26.0436	0.532857	0	0	0	0	0	22.5571	3.81	1.66929	11.425	52.88	47.12
98	193	Sino-Vietnamese Punitive	0	0.202632	0.0521053	0	37.1574	4.02474	0.318947	0.0947368	1.72368	0	0	16.6226	6.16316	4.20895	5.62474	0	0	3.49737	0.548947	0.0110526	0	0.0589474	0	0	1.86842	0.877368	9.31053	7.63368	46.6847	53.3153
99	199	Iran-Iraq	0	0.969167	0.196667	9.05933	0	0	0.00766667	0.0408333	0.00583333	0	0	0	13.0935	0.0005	3.41517	25.019	0	0	0	0	0.008	0.0005	0	0	16.844	1.6985	29.615	0.0263333	95.3562	4.64383
100	202	Falkland Islands	0	0	0	0	0	0	0	0	0	0	0	0	100	0	0	0	0	0	0	0	0	0	0	0	0	0	0	0	100	0
101	205	War over Lebanon	0	15.0433	3.32667	0	0	0	0	0	0	0	0	0	9.85667	0	0	36.3533	0	0	0	0	0	0	0	0	31.79	1.19667	2.41	0.0233333	81.63	18.37
102	207	War over the Aouzou Strip	0	0	0	97.4398	0	0	0	0	0	0	0	0	0.00288889	0	0	0.845333	0	0	0	0	0	0	0	0	0.024	0	1.68711	0.000888889	100	0
103	208	Sino-Vietnamese Border War	0	0.015	0.0383333	0	19.915	3.36833	0.356667	0	1.64333	0	0	28.0517	11.055	6.25	0	0	0	9.71667	1.80833	0.0333333	0	0.348333	0	0	1.83333	0.806667	9.21	5.55	62.7567	37.2433
104	211	Gulf War	0	0.496047	0.310698	61.7428	0	0	0	0	0	0	0	0	0.102558	0	0	15.6535	0	0	0	0	0	0	0	0	2.16419	0.407907	19.1223	0	99.1933	0.806744
105	215	Bosnian Independence	0	1.12619	0.618571	0	0	0	0	0.268095	12.0148	0	0	0	10.18	0.494762	0	0	0	0	0	0	0.306667	33.7957	0	0	11.58	5.78286	22.5	1.33238	51.87	48.13
106	216	Azeri-Armenian	22.96	0.0571429	0.387143	0	0	0	0	0.391429	16.4214	0	0.0528571	0	10.9271	1.64429	0	2.23143	0	0	0	0	0	0.0542857	0	0	13.3886	3.47143	24.6786	3.33429	82.6357	17.3643
107	217	Cenepa Valley	0.776667	0.623333	0.0133333	0	84.35	0	0	0	0	0	0	0	0.0166667	0.0166667	0	0	0	4.90333	0	0	0	0	0	0	1.25333	0.433333	5.04	2.57333	10.11	89.89
108	219	Badme Border	0	1.31091	0.0518182	6.78818	0	0	0	0	0	0	0	8.01636	13.5818	4.14273	4.72727	0.314545	0	0.142727	0	0	0	0	0	0	5.36273	5.32636	38.4282	11.8064	93.7673	6.23273
109	221	War for Kosovo	0	0.35125	2.07625	0	0	0	0	0.37625	18.9925	0	0	0	12.7687	0.6575	0	0	0	0	0	0	4.73375	18.0912	0	0	16.31	8.72125	16.095	0.82625	55.3787	44.6212
110	223	Kargil War	10.6333	0	0	33.39	0	0	0	0	0	0	0	0	1.72667	0	0	48.0333	1.79333	0	0	0	0	0	0	0	0	0	4.42333	0	98.2067	1.79333
111	225	Invasion of Afghanistan	1.64	0	0	1.03765	0	0	0	0	0	0	0	0.307059	3.45176	0	0.0764706	27.1153	0.636471	0	0	0	0	0	0	0	21.0276	0.811765	42.4247	1.47118	99.2871	0.712941
112	227	Invasion of Iraq	0	0.806923	1.43808	39.3012	0	0	0	0.00192308	0.0119231	0	0	0	0.645	0	0	23.9238	0	0	0	0	0.00115385	0.000384615	0	0	20.3462	5.07346	8.41077	0.0392308	97.7396	2.26038
